# Supplementary material for: A Systematic Review and Meta-Analysis of Malignant Rhabdoid and Small Cell Undifferentiated Liver Tumors: A Rational for a Uniform Classification
Source: MDPI journal article supplement (doi:10.3390/cancers14020272), 2022-01-06
Supplement: s1 [file s1]

## Supporting information File S2: List of included studies

| Authors                | Title                                                                                                                                                                                             | Year of publication | No° of Cases | Country  |
|------------------------|---------------------------------------------------------------------------------------------------------------------------------------------------------------------------------------------------|---------------------|--------------|----------|
| Gonzalez-Crussi et al. | <i>Infantile Sarcoma with Intracytoplasmic Filamentous Inclusions</i>                                                                                                                             | 1982                | 1            | USA      |
| Parham et al.          | <i>Malignant Rhabdoid Tumor of the Liver</i>                                                                                                                                                      | 1988                | 2            | USA      |
| Pierro et al.          | <i>Preoperative Chemotherapy in 'Unresectable' Hepatoblastoma</i>                                                                                                                                 | 1989                | 2            | Canada   |
| Hunt et al.            | <i>Malignant Rhabdoid Tumor of the Liver A Distinct Clinicopathologic Entity</i>                                                                                                                  | 1990                | 1            | USA      |
| Foschini et al.        | <i>Malignant rhabdoid tumour of the liver. A case report</i>                                                                                                                                      | 1992                | 1            | Belgium  |
|                        | <i>Undifferentiated Small Cell Hepatoblastoma with a Unique Chromosomal Translocation: A Case Report</i>                                                                                          | 1992                | 1            | USA      |
| Hansen et al.          | <i>Primary malignant rhabdoid tumour of the liver</i>                                                                                                                                             | 1993                | 1            | Canada   |
| DiCori et al.          | <i>Primary Extracranial Rhabdoid Tumors</i>                                                                                                                                                       | 1993                | 3            | USA      |
| Gururangan et al.      | <i>Clinicopathologic Features and Response to Ifosfamide</i>                                                                                                                                      |                     |              |          |
| Weymann et al.         | <i>Secretion of Vasointestinal Peptide by a Primary liver Tumor With Rhabdoid Features</i>                                                                                                        | 1993                | 1            | USA      |
| Kaiserling et al.      | <i>Immunohistochemical and cytogenetic findings in malignant rhabdoid tumor</i>                                                                                                                   | 1996                | 1            | Germany  |
| Scheimberg et al.      | <i>Primary Hepatic Malignant Tumor with Rhabdoid Features</i>                                                                                                                                     | 1996                | 3            | UK       |
| Tsunoda et al.         | <i>NON-ALPHA-FETOPROTEIN-PRODUCING ANAPLASTIC HEPATOBLASTOMA CELL LINE</i>                                                                                                                        | 1996                | 1            | Japan    |
|                        | <i>Malignant Rhabdoid Tumor of the Liver Diagnosed by Fine Needle Aspiration Cytology A Case Report</i>                                                                                           | 1997                | 1            | Slovenia |
| Pogacnik et al.        | <i>Primary Hepatic Malignant Tumor With Rhabdoid Features</i>                                                                                                                                     | 1998                | 1            | Spain    |
| Jimenez et al.         | <i>Spontaneous rupture of a malignant rhabdoid tumour of the liver</i>                                                                                                                            | 1998                | 1            | UK       |
| Kelly et al.           | <i>Congenital Disseminated Malignant Rhabdoid Tumor</i>                                                                                                                                           | 1999                | 1            | USA      |
| White et al.           | <i>Translocation (8;13)(q24.2;q33) in a Malignant Rhabdoid Tumor of the Liver</i>                                                                                                                 | 2000                | 1            | USA      |
| Donner et al.          | <i>CONGENITAL PRIMITIVE EPITHELIAL TUMOR OF THE LIVER SHOWING FOCAL RHABDOID FEATURES, PLACENTAL INVOLVEMENT, AND CLINICAL FEATURES MIMICKING MULTIFOCAL HEMANGIOMA OR STAGE 4S NEUROBLASTOMA</i> | 2000                | 1            | Japan    |
| Ohyama et al.          | <i>Undifferenziertes kleinzelliges Hepatoblastom</i>                                                                                                                                              | 2000                | 1            | Germany  |
| Sattler et al.         | <i>Small Cell Undifferentiated Histology in Hepatoblastoma May Be Unfavorable</i>                                                                                                                 | 2001                | 16           | USA      |
| Haas et al.            | <i>Long-Term Survival After Spontaneous Rupture of a Malignant Rhabdoid Tumor of the Liver</i>                                                                                                    | 2002                | 1            | UK       |
| Ravindra et al.        | <i>Hepatoblastoma - Cytomorphologic Characteristics in Serous Cavity Fluids</i>                                                                                                                   | 2002                | 1            | USA      |
| Weir et al.            | <i>Metastatic Malignant Rhabdoid Tumor of the Liver Treated With Tandem High-Dose Therapy and Autologous Peripheral Blood Stem Cell Rescue</i>                                                    | 2003                |              | USA      |
| Katzenstein et al.     | <i>Malignant rhabdoid tumor of the liver: Case report and literature review</i>                                                                                                                   | 2004                | 1            | Japan    |
| Yuri et al.            | <i>Midterm results with hepatectomy after preoperative chemotherapy in hepatoblastoma</i>                                                                                                         | 2005                | 3            | India    |
| Bajpai et al.          | <i>Establishment of a cell line from a malignant rhabdoid tumor of the liver lacking the function of two tumor suppressor genes, hSNF5/INI1 and p16</i>                                           | 2005                | 1            | Japan    |
| Kuroda et al.          | <i>Tumeur rhabdoïde hépatique maligne avec rupture spontanée</i>                                                                                                                                  | 2006                | 1            | France   |
| Clairotte et al.       | <i>Cytologic Diagnosis of Small Cell Anaplastic Hepatoblastoma</i>                                                                                                                                | 2006                | 1            | India    |
| Philipose et al.       | <i>Successful Management of Rhabdoid Tumor of the Liver</i>                                                                                                                                       | 2007                | 1            | USA      |
| Jayaram et al.         | <i>Extracranial Malignant Rhabdoid Tumors in Childhood</i>                                                                                                                                        | 2007                | 1            | USA      |
| Madigan et al.         | <i>Malignant Rhabdoid Tumor Mimicking</i>                                                                                                                                                         | 2007                | 1            | USA      |
| Wagner et al.          |                                                                                                                                                                                                   |                     |              |          |

|                         |                                                                                                                                      |      |   |           |
|-------------------------|--------------------------------------------------------------------------------------------------------------------------------------|------|---|-----------|
|                         | <i>Hepatoblastoma: A Case Report and Literature Review</i>                                                                           |      |   |           |
| Bourdeaut et al.        | <i>Extra-Renal Non-Cerebral Rhabdoid Tumours</i>                                                                                     | 2008 | 2 | France    |
| De Ioris et al.         | <i>Hepatoblastoma with a low serum alpha-fetoprotein level at diagnosis: The SIOPEL group experience</i>                             | 2008 | 8 | France    |
| Gutweiler et al.        | <i>Hepatoblastoma presenting with focal nodular hyperplasia after treatment of neuroblastoma</i>                                     | 2008 | 1 | USA       |
| Wu et al.               | <i>Rhabdoid tumour: a malignancy of early childhood with variable primary site, histology and clinical behaviour</i>                 | 2008 | 2 | Australia |
| Abe et al.              | <i>Malignant rhabdoid tumor of the liver: a case report with US and CT manifestation</i>                                             | 2009 | 1 | Japan     |
| Marzano et al.          | <i>Malignant Rhabdoid Tumour of the Liver in the Young Adult: Report of First Two Cases</i>                                          | 2009 | 1 | France    |
| Trobaugh-Lotario et al. | <i>Small Cell Undifferentiated Variant of Hepatoblastoma: Adverse Clinical and Molecular Features Similar to Rhabdoid Tumors</i>     | 2009 | 8 | USA       |
| Al Nassan et al.        | <i>INI1 (BAF 47) Immunohistochemistry is an Essential Diagnostic Tool for Children With Hepatic Tumors and Low Alpha Fetoprotein</i> | 2010 | 2 | Jordan    |
| Machado et al.          | <i>Immunohistochemical Study as a Tool in Differential Diagnosis of Pediatric Malignant Rhabdoid Tumor</i>                           | 2010 | 1 | Spain     |
| Lautz et al.            | <i>Successful Nontransplant Resection of POST-TEXT III and IV Hepatoblastoma</i>                                                     | 2011 | 2 | USA       |
| Martelli et al.         | <i>Malignant rhabdoid tumour of the liver in a seven-month-old female infant: A case report and literature review</i>                | 2013 | 1 | USA       |
| Agarwala et al.         | <i>Malignant rhabdoid tumor of the liver</i>                                                                                         | 2014 | 1 | India     |
| Kachanov et al.         | <i>Malignant rhabdoid tumor of the liver presented with initial tumor rupture</i>                                                    | 2014 | 1 | Russia    |
| Marty et al.            | <i>Tumeurs rhabdoides du nourrisson : une urgence diagnostique</i>                                                                   | 2014 | 1 | France    |
| Ting et al.             | <i>A Baby Girl with Distended Abdomen and Unusual Course of Umbilical Catheter</i>                                                   | 2014 | 1 | Canada    |
| Oita et al.             | <i>Malignant rhabdoid tumor of the liver: a case report and literature review</i>                                                    | 2015 | 1 | Japan     |
| Zhou et al.             | <i>Is INI1-retained small cell undifferentiated histology in hepatoblastoma unfavorable?</i>                                         | 2015 | 7 | USA       |
| Kupeli et al.           | <i>Infantile rhabdoid tumor mimicking hepatic hemangioendothelioma</i>                                                               | 2016 | 1 | Turkey    |
| Vlajnic et al.          | <i>Fine Needle Aspiration in the Diagnosis and Classification of Hepatoblastoma</i>                                                  | 2016 | 1 | France    |
| Farber et al.           | <i>Prognostic factors and survival in non-central nervous system rhabdoid tumors</i>                                                 | 2017 | 1 | USA       |
| Cornet et al.           | <i>Rhabdoid tumor of the liver: Report of 6 pediatric cases treated at a single institute</i>                                        | 2018 | 6 | France    |
| Kapral et al.           | <i>Pediatric hepatic rhabdoid tumor: A rare cause of abdominal mass in children</i>                                                  | 2018 | 1 | USA       |
| Fazlollahi et al.       | <i>Malignant Rhabdoid Tumor, an Aggressive Tumor Often Misclassified as Small Cell Variant of Hepatoblastoma</i>                     | 2019 | 6 | USA       |
| Bharti et al.           | <i>Common and Rare Histological Variants of Hepatoblastoma in Children: A Pathological Diagnosis and Review of the Literature</i>    | 2021 | 1 | India     |
| Ivana et al.            | <i>Malignant rhabdoid tumor—The great mimicker: Two case reports</i>                                                                 | 2021 | 2 | Serbia    |
