# Supplementary material for: A Systematic Review and Meta-Analysis of Malignant Rhabdoid and Small Cell Undifferentiated Liver Tumors: A Rational for a Uniform Classification
Source: MDPI journal article supplement (doi:10.3390/cancers14020272), 2022-01-06
Supplement: s1 [file s1]

# Supplementary Material File S4: ROB of retrospective observational studies with MINORS

| MINORS Items                                 | Haas et al. | Bajpai et al. | De Ioris et al. | Zhou et al. | Cornet et al. | Fazlollahi et al. | Lautz et al. |
|----------------------------------------------|-------------|---------------|-----------------|-------------|---------------|-------------------|--------------|
| Clearly stated aim                           | 1           | 1             | 2               | 2           | 2             | 2                 | 2            |
| Inclusion of consecutive patients            | 2           | 2             | 2               | 2           | 2             | 2                 | 2            |
| Prospective collection of data               | 2           | 1             | 2               | 1           | 1             | 1                 | 1            |
| Endpoints appropriate to aim of study        | 1           | 1             | 2               | 2           | 2             | 2                 | 2            |
| Unbiased assessment of the study endpoint    | 1           | 1             | 1               | 1           | 1             | 1                 | 1            |
| Follow-up period appropriate to aim of study | 2           | 1             | 2               | 2           | 1             | 1                 | 2            |
| Loss to follow up less than 5%               | 2           | 2             | 2               | 2           | 2             | 2                 | 2            |
| Prospective calculation of the study size    | 0           | 0             | 0               | 0           | 0             | 0                 | 0            |
| Total                                        | 11/16       | 9/16          | 13/16           | 12/16       | 11/16         | 11/16             | 12/16        |
