# Supplementary material for: A Systematic Review and Meta-Analysis of Malignant Rhabdoid and Small Cell Undifferentiated Liver Tumors: A Rational for a Uniform Classification
Source: MDPI journal article supplement (doi:10.3390/cancers14020272), 2022-01-06
Supplement: s1 [file s1]

## Supplementary Material File S3: Risk of bias assessment of case reports/series

| Study                  | Selection | Ascertainment | Causality | Reporting | Overall risk of bias |
|------------------------|-----------|---------------|-----------|-----------|----------------------|
| Gonzalez-Crussi et al. | high      | high          | moderate  | high      | high                 |
| Parham et al.          | moderate  | moderate      | moderate  | high      | high                 |
| Pierro et al.          | low       | moderate      | moderate  | high      | high                 |
| Hunt et al.            | high      | moderate      | moderate  | moderate  | moderate             |
| Foschini et al.        | high      | moderate      | moderate  | moderate  | moderate             |
| Hansen et al.          | high      | moderate      | moderate  | moderate  | moderate             |
| DiCori et al.          | high      | high          | moderate  | high      | high                 |
| Gururangan et al.      | low       | moderate      | moderate  | moderate  | moderate             |
| Weymann et al.         | high      | moderate      | moderate  | moderate  | moderate             |
| Kaiserling et al.      | moderate  | moderate      | moderate  | high      | high                 |
| Scheimberg et al.      | low       | moderate      | moderate  | high      | high                 |
| Tsunoda et al.         | high      | moderate      | moderate  | high      | high                 |
| Pogacnik et al.        | high      | moderate      | moderate  | moderate  | moderate             |
| Jimenez et al.         | high      | moderate      | moderate  | moderate  | moderate             |
| Kelly et al.           | high      | moderate      | moderate  | moderate  | moderate             |
| White et al.           | low       | moderate      | moderate  | high      | moderate             |
| Donner et al.          | high      | moderate      | moderate  | moderate  | moderate             |
| Ohyama et al.          | high      | moderate      | low       | moderate  | moderate             |
| Sattler et al.         | high      | moderate      | moderate  | high      | high                 |
| Ravindra et al.        | high      | low           | low       | moderate  | low                  |
| Weir et al.            | high      | moderate      | moderate  | high      | high                 |
| Katzenstein et al.     | high      | moderate      | moderate  | moderate  | moderate             |
| Yuri et al.            | high      | moderate      | moderate  | low       | moderate             |
| Kuroda et al.          | high      | moderate      | moderate  | high      | high                 |
| Clairotte et al.       | high      | moderate      | moderate  | low       | moderate             |
| Philipose et al.       | high      | moderate      | High      | high      | high                 |
| Jayaram et al.         | high      | low           | low       | low       | low                  |

|                           |          |          |          |          |          |
|---------------------------|----------|----------|----------|----------|----------|
| Madigan et al.            | low      | moderate | moderate | high     | high     |
| Wagner et al.             | high     | moderate | moderate | low      | moderate |
| Boudeaut et al.           | low      | moderate | moderate | high     | moderate |
| Gutweiler et al.          | high     | low      | moderate | moderate | moderate |
| Wu et al.                 | low      | low      | moderate | high     | moderate |
| Abe et al.                | high     | low      | low      | moderate | Moderate |
| Trobaugh-Lotrario et al.. | moderate | moderate | high     | high     | high     |
| Marzano et al.            | moderate | moderate | moderate | low      | moderate |
| Al Nassan et al.          | moderate | moderate | moderate | low      | moderate |
| Machado et al.            | moderate | moderate | moderate | moderate | moderate |
| Martelli et al.           | high     | moderate | moderate | moderate | moderate |
| Agarwala et al.           | high     | moderate | moderate | high     | high     |
| Kachanov et al.           | high     | low      | low      | low      | low      |
| Marty et al.              | moderate | moderate | moderate | moderate | moderate |
| Ting et al                | high     | moderate | moderate | moderate | moderate |
| Oita et al.               | high     | moderate | moderate | low      | moderate |
| Vlajnic et al.            | low      | moderate | high     | moderate | high     |
| Kupeli et al.             | high     | moderate | moderate | moderate | moderate |
| Farber et al.             | low      | moderate | high     | high     | high     |
| Kapral et al.             | high     | low      | moderate | low      | low      |
| Bharti et al.             | moderate | moderate | moderate | high     | high     |
| Ivana et al.              | moderate | moderate | low      | low      | low      |
